# Supplementary material for: Photoinduced water oxidation by an organic ligand incorporated into the framework of a stable metal–organic framework
Source: PubMed Central journal article supplement (PMC5590092; doi:10.1039/c5sc02679b), 2015-11-11
Supplement: SC-007-C5SC02679B-s001.pdf [file SC-007-C5SC02679B-s001.pdf]

## Supporting Information

# Photoinduced water oxidation by an organic ligand incorporated into the framework of a stable metal-organic framework

Yun-Nan Gong,<sup>a,b</sup> Ting Ouyang,<sup>a</sup> Chun-Ting He<sup>a</sup> and Tong-Bu Lu<sup>\*a</sup>

<sup>a</sup> MOE Key Laboratory of Bioinorganic and Synthetic Chemistry, State Key Laboratory of Optoelectronic Materials and Technologies, School of Chemistry and Chemical Engineering, Sun Yat-Sen University, Guangzhou 510275 (China)

<sup>b</sup> College of Chemistry and Chemical Engineering, Gannan Normal University, Ganzhou 341000 (China)

**Transient Time.** The transient decay time was calculated according to the following formula:

$$t_D = \frac{I_t - I_{st}}{I_{in} - I_{st}} \quad (\text{S1})$$

where  $I_{in}$  and  $I_t$  stand for the photocurrent densities at 0 s and t s,  $I_{st}$  represents the steady-state photocurrent density (Fig. S9).

**Table S1.** Crystal Data and Structure Refinements for **1**

|                                                                  | <b>1</b>                                           |
|------------------------------------------------------------------|----------------------------------------------------|
| Formula                                                          | C <sub>24</sub> H <sub>20</sub> NO <sub>9</sub> La |
| Fw.                                                              | 605.32                                             |
| Crystal system                                                   | monoclinic                                         |
| Space group                                                      | <i>Cc</i>                                          |
| <i>a</i> (Å)                                                     | 18.4394(5)                                         |
| <i>b</i> (Å)                                                     | 13.7828(3)                                         |
| <i>c</i> (Å)                                                     | 8.1160(2)                                          |
| $\alpha$ (°)                                                     | 90                                                 |
| $\beta$ (°)                                                      | 92.319(2)                                          |
| $\gamma$ (°)                                                     | 90                                                 |
| <i>V</i> (Å <sup>3</sup> )                                       | 2060.96(9)                                         |
| <i>Z</i>                                                         | 4                                                  |
| <i>D<sub>c</sub></i> (g·cm <sup>-3</sup> )                       | 1.657                                              |
| Reflections/ Unique                                              | 5354 / 2453                                        |
| <i>R</i> (int)                                                   | 0.0421                                             |
| GOF on <i>F</i> <sup>2</sup>                                     | 1.077                                              |
| <i>R</i> <sub>1</sub> [ <i>I</i> ≥ 2σ( <i>I</i> )] <sup>a</sup>  | 0.0373                                             |
| <i>wR</i> <sub>2</sub> [ <i>I</i> ≥ 2σ( <i>I</i> )] <sup>b</sup> | 0.0917                                             |

<sup>a</sup>  $R_1 = \frac{\sum ||F_o| - |F_c||}{\sum |F_o|}$ . <sup>b</sup>  $wR_2 = [\frac{\sum [w(F_o^2 - F_c^2)^2]}{\sum w(F_o^2)^2}]^{1/2}$ , where  $w = 1/[\sigma^2(F_o)^2 + (aP)^2 + bP]$  and  $P = (F_o^2 + 2F_c^2)/3$ .

**Table S2.** Selected Bond Distances (Å) and Angles (°) for **1**.

| <b>1</b>            |            |                     |            |
|---------------------|------------|---------------------|------------|
| La(1)-O(1)          | 2.651(6)   | La(1)-O(6)#2        | 2.635(5)   |
| La(1)-O(1W)         | 2.578(6)   | La(1)-O(3)#3        | 2.758(6)   |
| La(1)-O(2)          | 2.593(5)   | La(1)-O(4)#3        | 2.505(6)   |
| La(1)-O(1)#1        | 2.606(6)   | La(1)-O(3)#4        | 2.509(6)   |
| La(1)-O(5)#2        | 2.673(6)   | La(1)-O(6)#5        | 2.606(5)   |
| O(1)-La(1)-O(1W)    | 128.32(18) | O(1W)-La(1)-O(6)#2  | 82.53(18)  |
| O(1)#1-La(1)-O(3)#4 | 143.59(18) | O(3)#3-La(1)-O(3)#4 | 128.70(17) |
| O(1)-La(1)-O(2)     | 49.82(17)  | O(1W)-La(1)-O(3)#3  | 64.66(17)  |
| O(1)#1-La(1)-O(6)#5 | 145.20(17) | O(3)#3-La(1)-O(6)#5 | 115.50(17) |
| O(1)-La(1)-O(1)#1   | 102.01(18) | O(1W)-La(1)-O(4)#3  | 77.2(2)    |
| O(5)#2-La(1)-O(6)#2 | 49.43(16)  | O(3)#4-La(1)-O(4)#3 | 138.98(18) |
| O(1)-La(1)-O(5)#2   | 77.13(16)  | O(1W)-La(1)-O(3)#4  | 70.36(19)  |
| O(3)#3-La(1)-O(5)#2 | 108.74(16) | O(4)#3-La(1)-O(6)#5 | 79.62(18)  |
| O(1)-La(1)-O(6)#2   | 126.54(17) | O(1W)-La(1)-O(6)#5  | 68.20(18)  |
| O(4)#3-La(1)-O(5)#2 | 148.74(17) | O(3)#4-La(1)-O(6)#5 | 65.60(17)  |
| O(1)-La(1)-O(3)#3   | 162.59(17) | O(1)#1-La(1)-O(2)   | 75.26(17)  |
| O(3)#4-La(1)-O(5)#2 | 70.88(17)  | O(2)-La(1)-O(5)#2   | 108.09(17) |
| O(1)-La(1)-O(4)#3   | 117.82(18) | O(2)-La(1)-O(6)#2   | 140.52(17) |
| O(5)#2-La(1)-O(6)#5 | 131.00(16) | O(2)-La(1)-O(3)#3   | 113.31(16) |
| O(1)-La(1)-O(3)#4   | 68.59(18)  | O(2)-La(1)-O(4)#3   | 71.28(17)  |
| O(3)#3-La(1)-O(6)#2 | 61.81(16)  | O(2)-La(1)-O(3)#4   | 115.13(17) |
| O(1)-La(1)-O(6)#5   | 67.06(17)  | O(2)-La(1)-O(6)#5   | 72.94(17)  |
| O(4)#3-La(1)-O(6)#2 | 110.52(17) | O(1)#1-La(1)-O(5)#2 | 72.74(16)  |
| O(1W)-La(1)-O(2)    | 133.35(19) | O(1)#1-La(1)-O(6)#2 | 67.29(17)  |
| O(3)#4-La(1)-O(6)#2 | 89.68(17)  | O(1)#1-La(1)-O(3)#3 | 65.63(17)  |
| O(1)#1-La(1)-O(1W)  | 129.60(18) | O(1)#1-La(1)-O(4)#3 | 77.12(18)  |
| O(6)#2-La(1)-O(6)#5 | 146.35(17) | O(3)#3-La(1)-O(4)#3 | 49.32(17)  |
| O(1W)-La(1)-O(5)#2  | 116.60(19) |                     |            |

Symmetry codes: #1:  $x, -y + 1, z - 1/2$ ; #2:  $x - 1/2, y - 1/2, z - 1$ ; #3:

$x - 1/2, y + 1/2, z - 1$ ; #4:  $x - 1/2, -y + 1/2, z - 1/2$ ; #5:  $x - 1/2, -y + 3/2, z - 1/2$ .

**Table S3.** N<sub>2</sub> Adsorption Results for the Samples of Desolvated **1** After Treating Under Different Conditions.

| Treatment conditions <sup>a</sup> | N <sub>2</sub> uptake<br>(STP<br>cm <sup>3</sup> ·g <sup>-1</sup> ) | BET surface<br>area (m <sup>2</sup> ·g <sup>-1</sup> ) | Total pore<br>volume<br>(cm <sup>3</sup> ·g <sup>-1</sup> ) | Decomposition <sup>b</sup> |
|-----------------------------------|---------------------------------------------------------------------|--------------------------------------------------------|-------------------------------------------------------------|----------------------------|
| As-synthesized                    | 150                                                                 | 467                                                    | 0.24                                                        | ND                         |
| Boiling water                     | 148                                                                 | 462                                                    | 0.24                                                        | ND                         |
| pH = 1                            | 150                                                                 | 456                                                    | 0.24                                                        | ND                         |
| pH = 2                            | 153                                                                 | 468                                                    | 0.24                                                        | ND                         |
| pH = 12                           | 154                                                                 | 476                                                    | 0.24                                                        | ND                         |
| pH = 13                           | 154                                                                 | 462                                                    | 0.25                                                        | 0.07 %                     |

<sup>a</sup> Boiling water, pH = 1, 2, 12, 13 correspond to the treatment conditions of soaking the samples of desolvated **1** in boiling water and in aqueous solutions for 7 days with pH values of 1, 2, 12 and 13, respectively.

<sup>b</sup> Calculated based on UV-vis standard curve of TTCA<sup>3-</sup> (Fig. S5). ND = No decomposition.

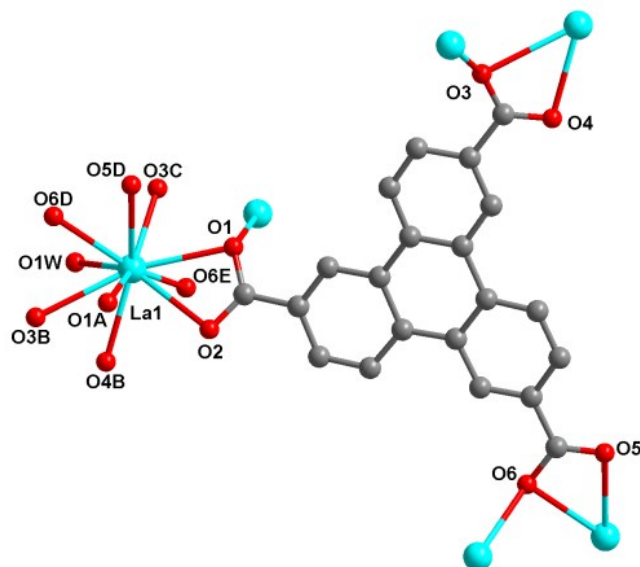

**Fig. S1.** The coordination environments of La(III) and TTCA<sup>3-</sup> anion in **1** (symmetry operations: A:  $x, -y + 1, z - 1/2$ ; B:  $x - 1/2, y + 1/2, z - 1$ ; C:  $x - 1/2, -y + 1/2, z - 1/2$ ; D:  $x - 1/2, y - 1/2, z - 1$ ; E:  $x - 1/2, -y + 3/2, z - 1/2$ ).

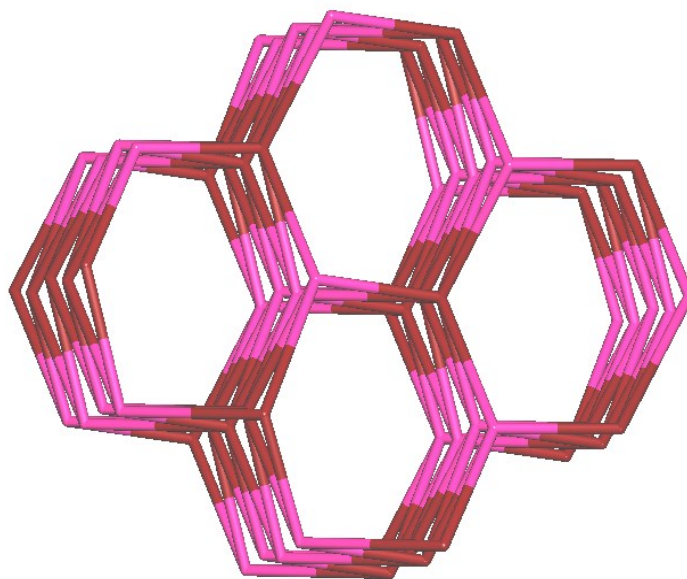

**Fig. S2.** 6,6-Connected 3D net derived from the structure of **1**. Pink: 6-connected nodes of TTCA ligands, brown: 6-connected nodes of La ions.

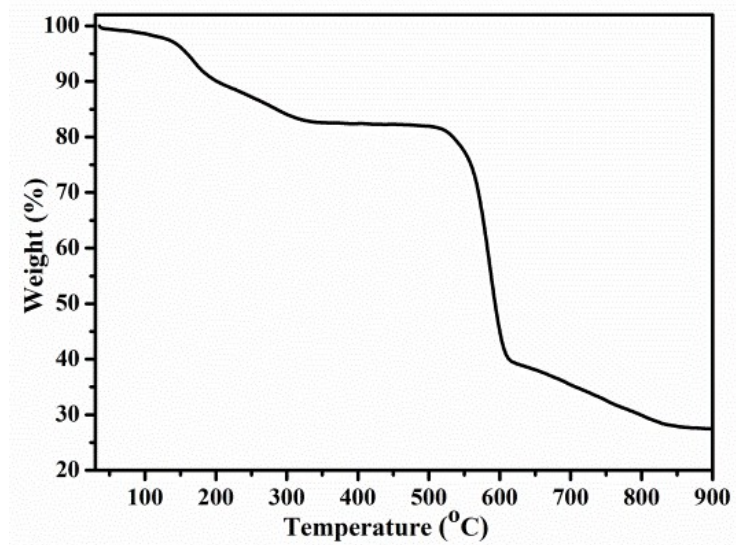

Fig. S3. TGA curve for 1.

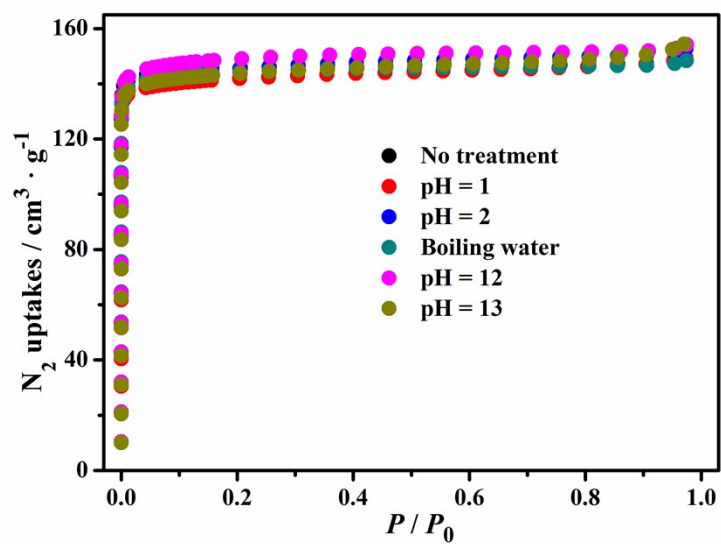

Fig. S4. N<sub>2</sub> sorption isotherms for 1d before and after stability tests.

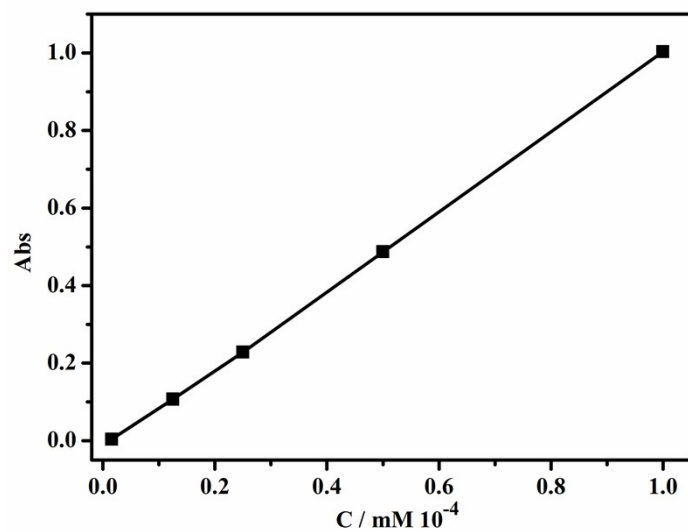

**Fig. S5.** The UV-vis standard curve of  $\text{TTCA}^{3-}$  in aqueous solution.

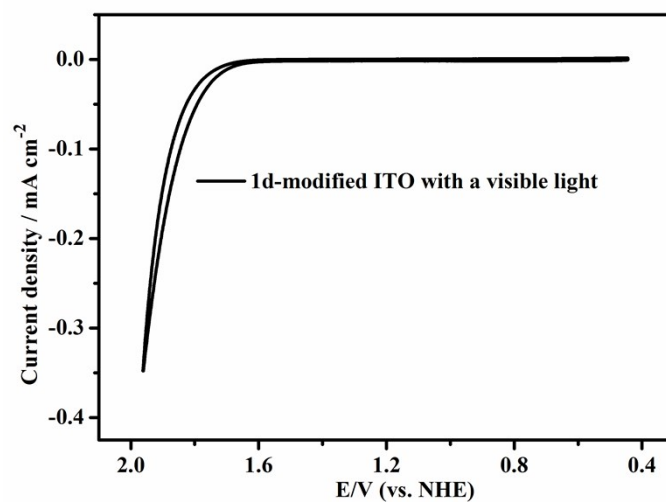

**Fig. S6.** Cyclic voltammogram of **1d**-modified electrode irradiated with a visible light ( $\lambda > 420$  nm) in 0.2 M NaOAc/HOAc buffer at pH 5.0, saturated calomel as reference electrode (0.244 V vs. NHE), and Pt foil as counter electrode.

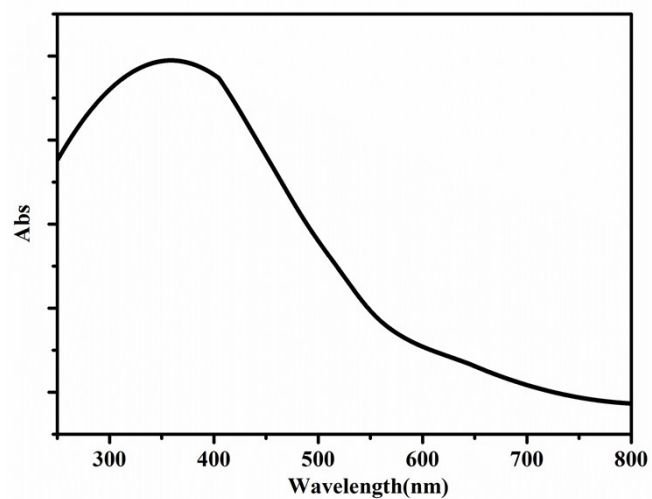

**Fig. S7.** The UV-vis diffuse-reflectance spectra of **1**.

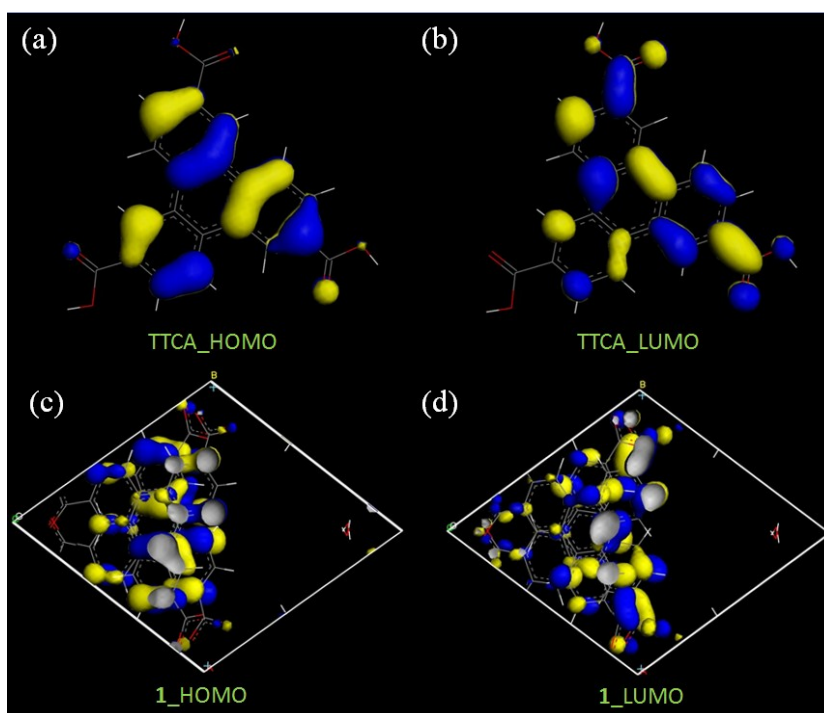

**Fig. S8.** HOMO and LUMO of the organic ligand TTCA (a, b) and the MOF **1** (c, d). (Note: Both HOMO and LUMO in the ligand and MOF **1** distribute on the organic components)



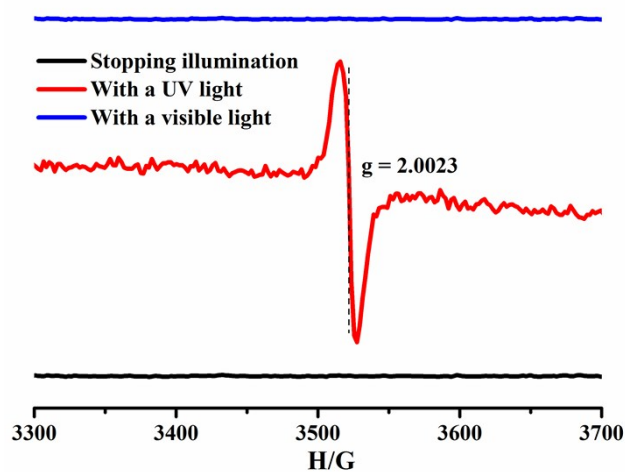

**Fig. S9.** The ESR spectra of the solid **1d** by irradiating with a high-pressure mercury lamp (red line) and a visible light (blue line), and stopping illumination (black line).

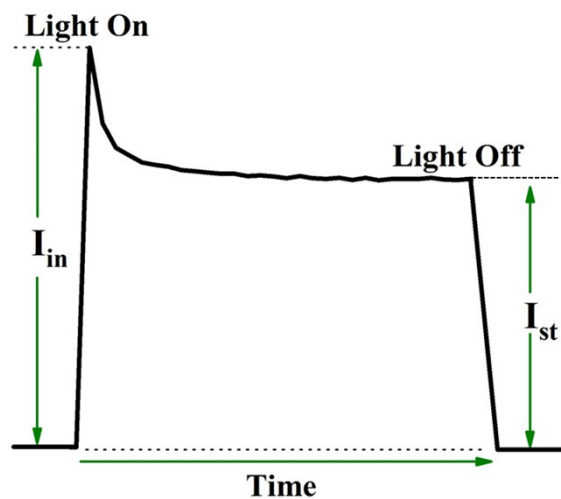

**Fig. S10.** A typical transient response photocurrent at a bias of 0.6 V vs. NHE.

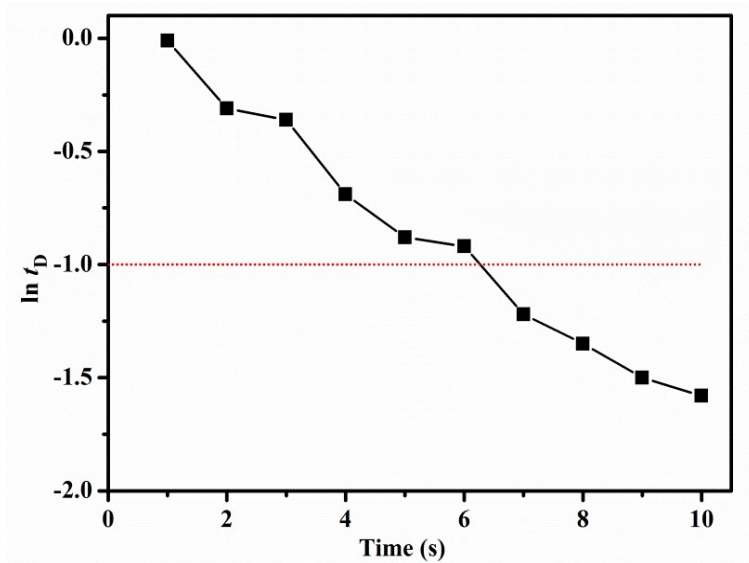

**Fig. S11.** The transient time constant of **1**.

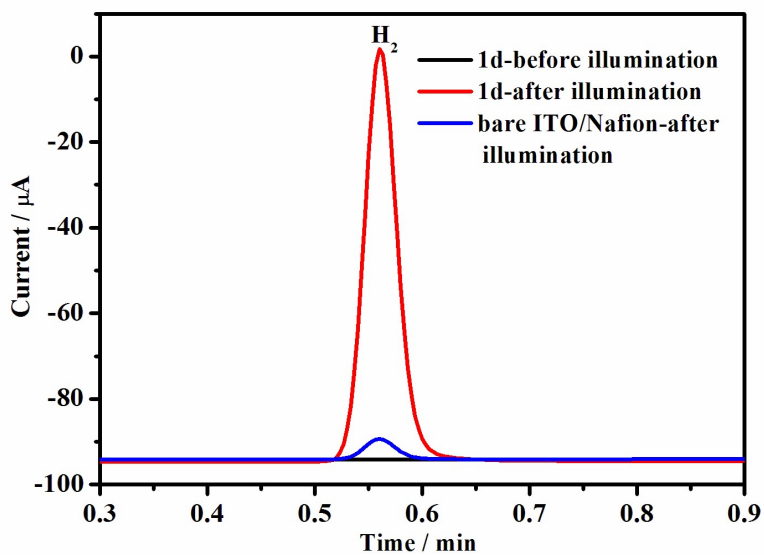

**Fig. S12.** GC data of  $\text{H}_2$  for **1d**-modified electrode before (black line) and after (red line) light illumination, and for bare ITO/Nafion electrode after (blue line) light illumination for the PEC cell.

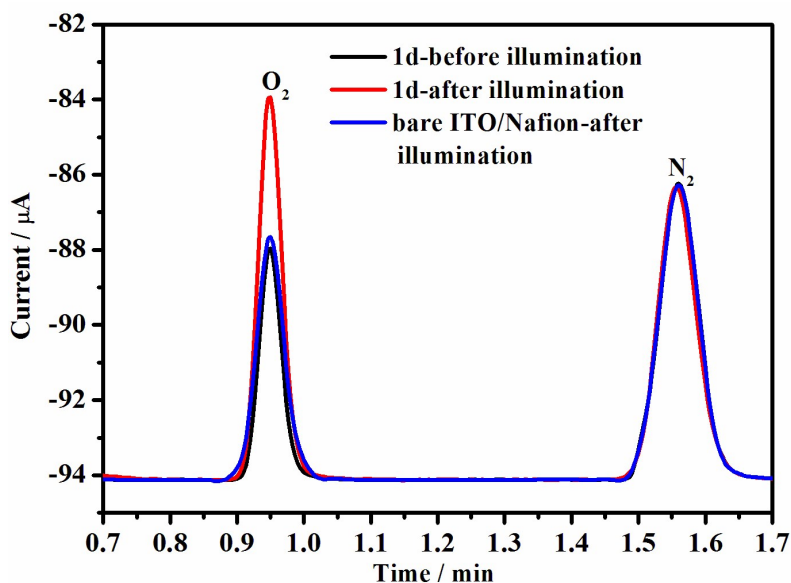

**Fig. S13.** GC data of  $O_2$  and  $N_2$  for **1d**-modified before (black line) and after (red line) light illumination, and for bare ITO/Nafion after (blue line) light illumination for the PEC cell. The intensity of  $O_2$  (black line) comes from the residue of  $O_2$  in the reaction system.

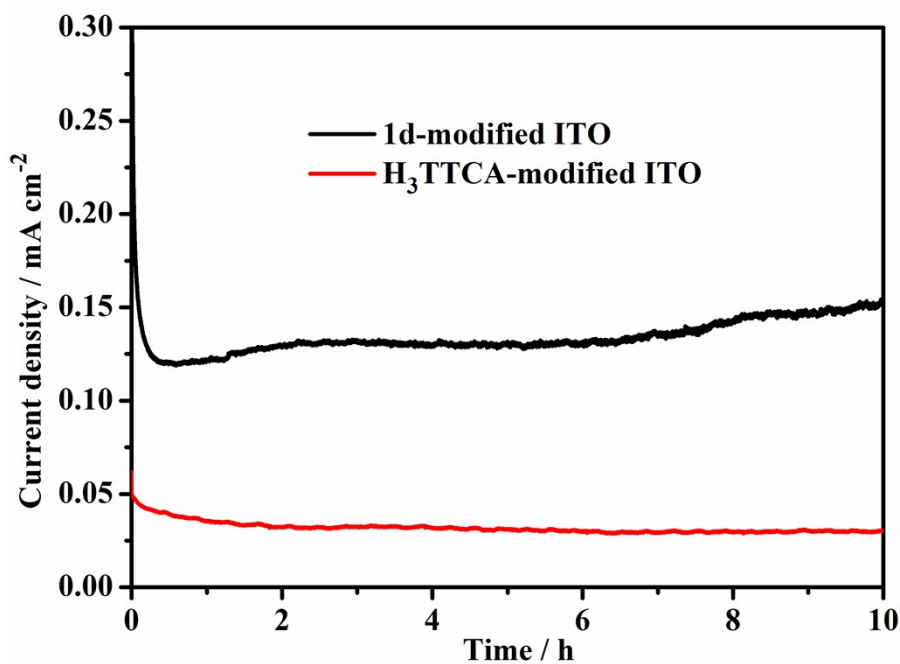

**Fig. S14** Three-electrode photocurrent measurements with a 1.96 V (vs. NHE) external bias for  $H_3TTCA$  modified ITO and **1d**-modified ITO photoanodes in 0.2 M NaOAc/HOAc buffer solution (pH 5.0) for 10 h of UV light illumination.

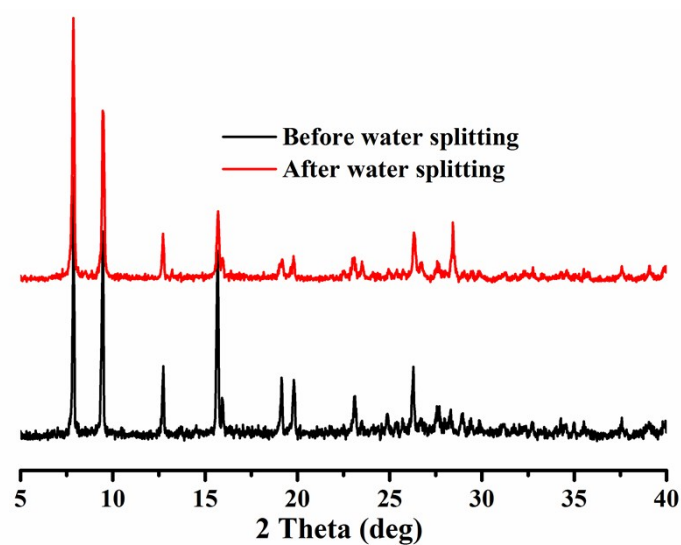

**Fig. S15.** The PXRD patterns of **1** before and after the water splitting experiment.

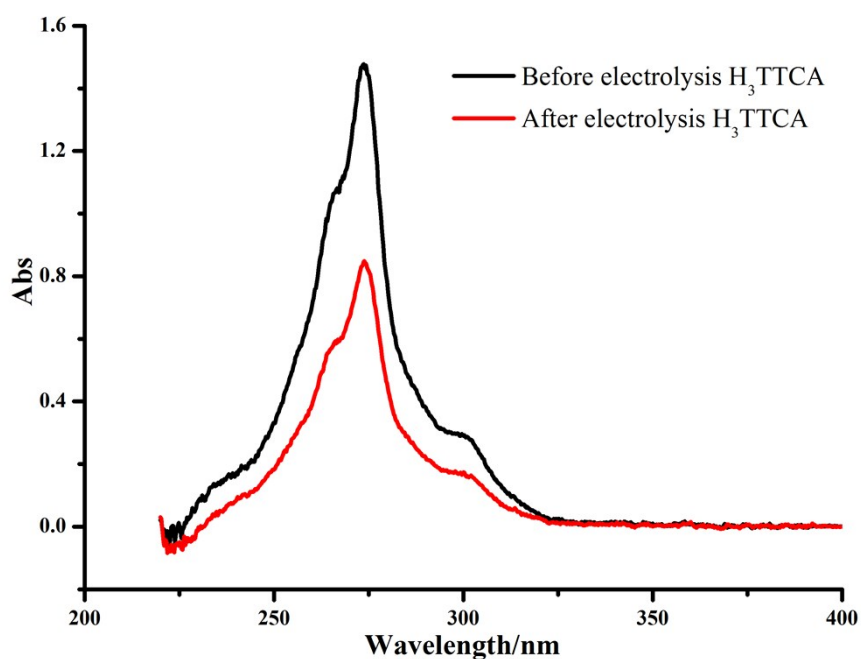

**Fig. S16.** The UV-vis spectra for the H<sub>3</sub>TTCA-modified electrode before and after electrolysis in 0.2 M NaOAc/HOAc buffer solution (pH 5.0) irradiated with a high-pressure mercury lamp, the samples were obtained by dissolving the H<sub>3</sub>TTCA in H<sub>3</sub>TTCA-modified electrode after electrolysis (red line) and the same amount of H<sub>3</sub>TTCA before electrolysis (black line) with 1.0 mL of 0.05 M NaOH, and 0.2 mL of

the above solution was dissolved in 4.8 mL of 0.2 M NaOAc/HOAc buffer solution (pH 5.0).
